# Supplementary material for: Contribution of GABAergic interneurons to amyloid-β plaque pathology in an APP knock-in mouse model
Source: PubMed Central journal article supplement (PMC6950898; doi:10.1186/s13024-019-0356-y), 2020-01-08

2mo *App*<sup>NL-G-F/NL-G-F</sup>

3mo *App*<sup>NL-G-F/NL-G-F</sup>

4mo *App*<sup>NL-G-F/NL-G-F</sup>

6mo *App*<sup>NL-G-F/NL-G-F</sup>

Subfields

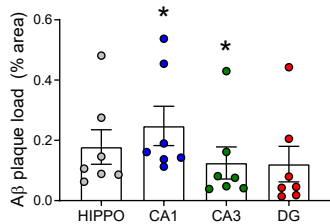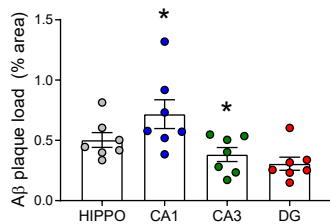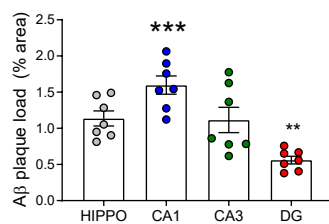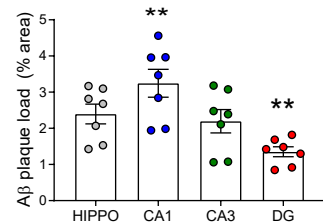

CA1

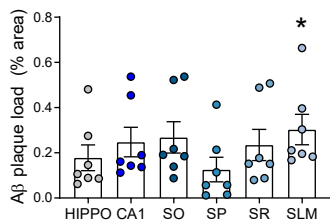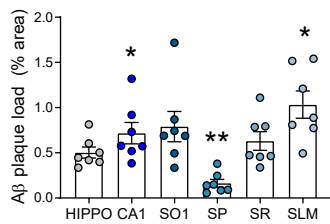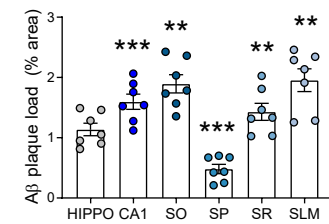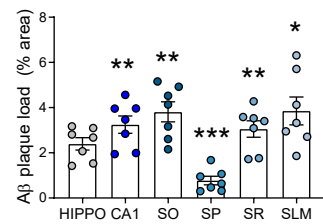

CA2/3

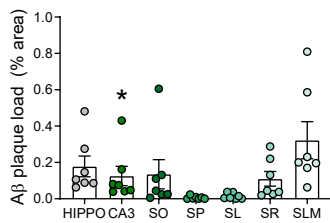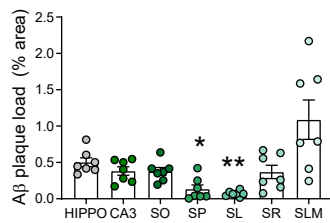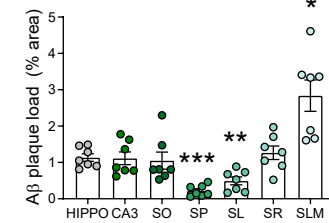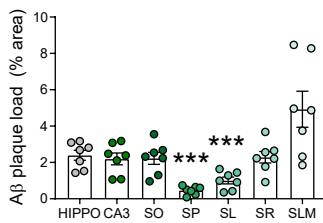

DG

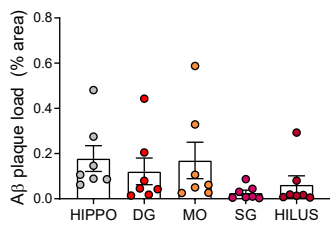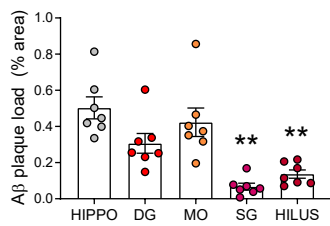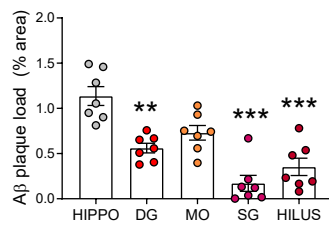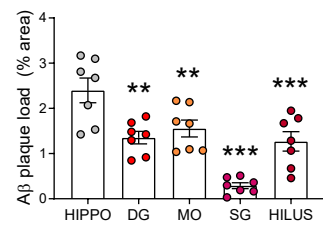

Supplement: 13024_2019_356_MOESM3_ESM.pdf [file 13024_2019_356_MOESM3_ESM.pdf]
