# Supplementary material for: Contribution of GABAergic interneurons to amyloid-β plaque pathology in an APP knock-in mouse model
Source: PubMed Central journal article supplement (PMC6950898; doi:10.1186/s13024-019-0356-y), 2020-01-08

Laminae Segmentation

1. Segment hippocampal laminae based on VGLUT1 staining.

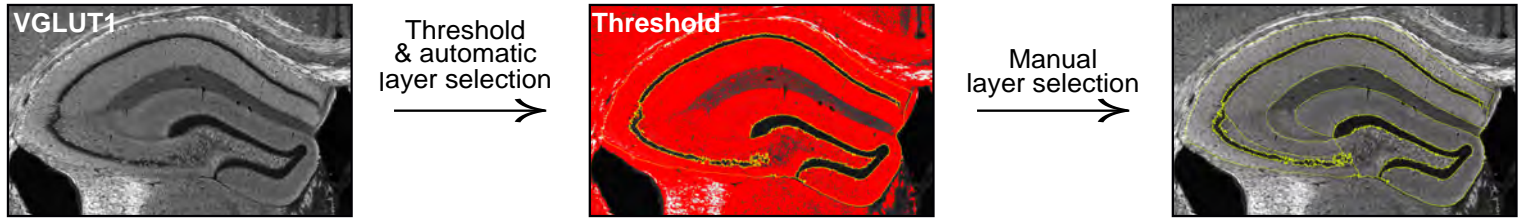

Subfield Refinement

2. Refine CA1 & CA2/3 hippocampal subfields based on WFS1 staining.

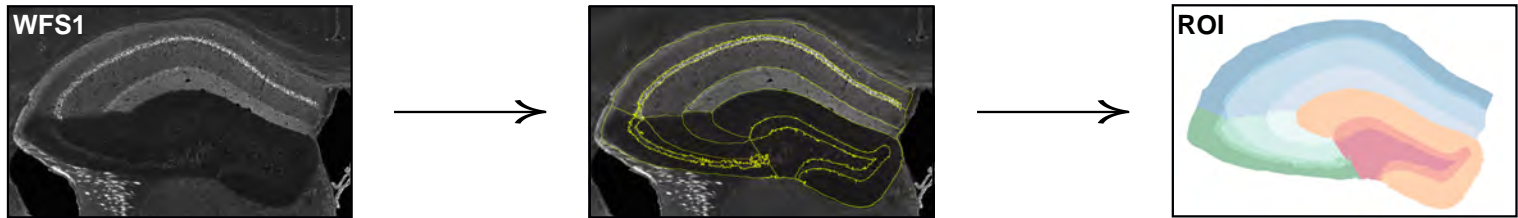

A $\beta$  Plaque Mask Creation

3. Create mask for A $\beta$  plaques based on 6E10 staining.

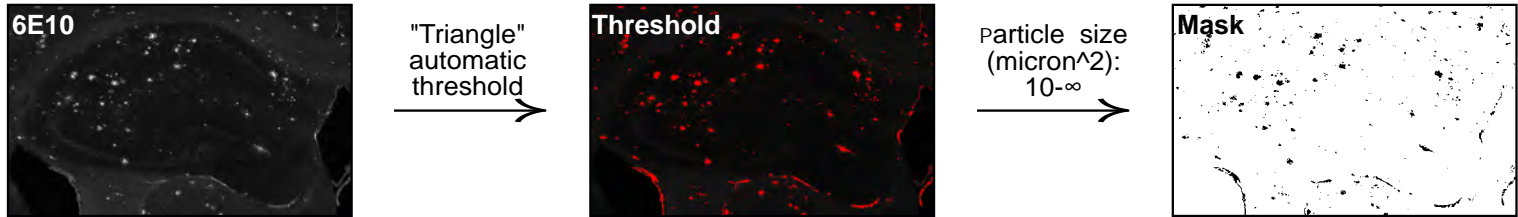

A $\beta$  Plaque Quantification

4. Combine ROIs for layers and subfields with mask for amyloid plaques and quantify plaque load.

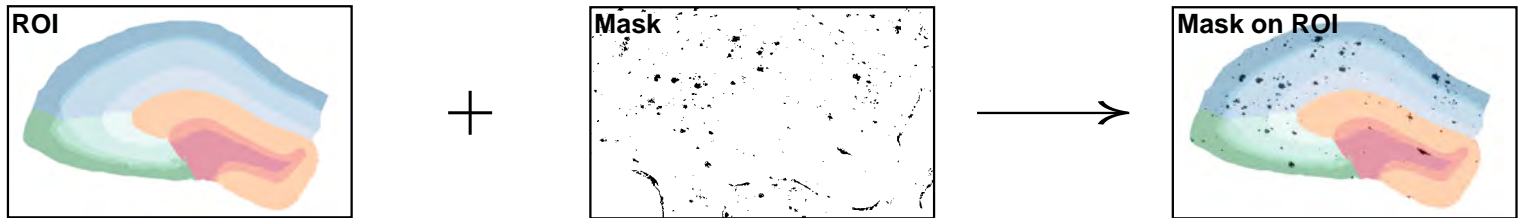

Supplement: 13024_2019_356_MOESM2_ESM.pdf [file 13024_2019_356_MOESM2_ESM.pdf]
