# Supplementary material for: Contribution of GABAergic interneurons to amyloid-β plaque pathology in an APP knock-in mouse model
Source: PubMed Central journal article supplement (PMC6950898; doi:10.1186/s13024-019-0356-y), 2020-01-08

# GADiCre

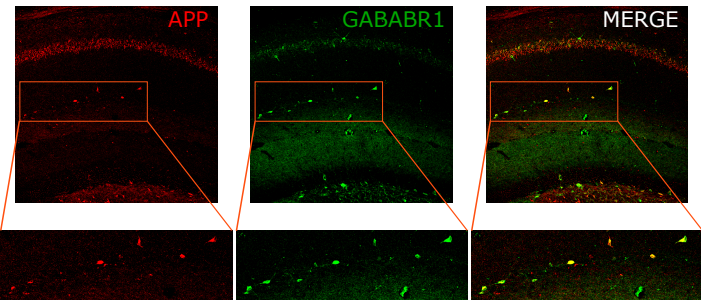

# GADiCre;APP<sup>flox/flox</sup>;APLP2-KO

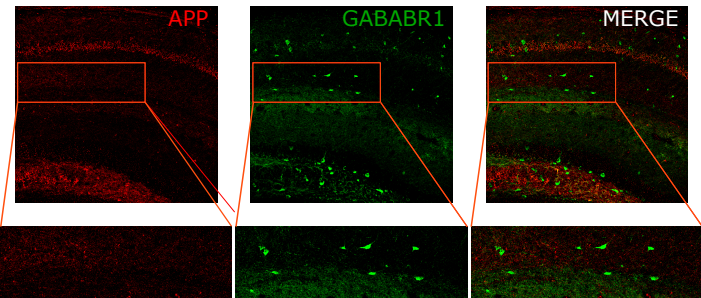

Supplement: 13024_2019_356_MOESM4_ESM.pdf [file 13024_2019_356_MOESM4_ESM.pdf]
