# Supplementary material for: Contribution of GABAergic interneurons to amyloid-β plaque pathology in an APP knock-in mouse model
Source: PubMed Central journal article supplement (PMC6950898; doi:10.1186/s13024-019-0356-y), 2020-01-08
Supplement: 13024_2019_356_MOESM5_ESM.pdf [file 13024_2019_356_MOESM5_ESM.pdf]

### Total Hippocampus - 6 mo

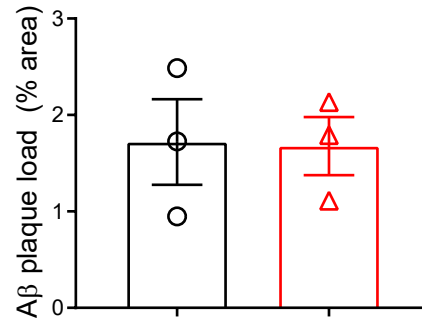

○ APP<sup>NL-G-F/NL-G-F</sup>;GAD2Cre  
△ APP<sup>NL-G-F/NL-G-F</sup>;GAD2Cre;Bace1<sup>flox/flox</sup>
